# Supplementary material
Source: publisher site journal article supplement (https://www.spandidos-publications.com/922/downloadSupplementary)
Supplement: Supplementary file 1 [file downloadSupplementary]

Table SI. Definition of the 11 MRI features.

| Feature                                                     | Definition                                                                                                                                                                                                    |
|-------------------------------------------------------------|---------------------------------------------------------------------------------------------------------------------------------------------------------------------------------------------------------------|
| Placenta previa                                             | Placenta covering the cervix (marginal, partial or complete placenta previa), or a low-lying placenta, whose extremity is located at <2 cm from the internal cervical os.                                     |
| Focal defect of the UPI                                     | Interruption or a defect of any of the three normal layers.                                                                                                                                                   |
| Myometrial thinning                                         | Thickness of the myometrium of the uterus $\leq 2$ mm. Generally accompanied with focal defect of the UPI; however, the myometrial thickness of patients with focal defect of the UPI may be >2 mm.           |
| Disruption of the inner layer of the UPI                    | Interruption or thinning of the inner layer of the UPI.                                                                                                                                                       |
| Intraplacental thick dark bands                             | Hypointense areas on SSFSE T2W and FIESTA images, preferentially located on the maternal surface of the placenta, with the longest diameter >20 mm.                                                           |
| Focal defect of the interval between the bladder and uterus | Disappearance of the fat gap between the bladder and the uterus, displaying an irregular and discontinuous hypointense bladder serosa.                                                                        |
| Increased placental vascularity                             | Presence of irregular, large or tortuous intraplacental vessels. The vessels are defined by irregular flow voids on SSFSE T2W images and isointense on FIESTA images.                                         |
| Markedly heterogeneous placenta                             | Heterogeneity of the placenta. Presence of hyperintense or/and hypointense areas in the placenta. This partly depends on the presence of intraplacental thick dark bands and increased placental vascularity. |
| Uterine bulge                                               | Abnormal bulging of uterus where PAS is suspected.                                                                                                                                                            |
| Increased uterine vascularity                               | Irregular, large or tortuous vessels in adjacent myometrium where PAS is suspected.                                                                                                                           |
| Increased vascularity at UPI                                | Vessels at the UPI increase or/and the vessels run through the myometrium and the placenta.                                                                                                                   |

UPI, uteroplacental interface; PAS, placenta accreta spectrum; SSFSE T2W, single-shot fast spin echo T2-weighted; FIESTA, fast imaging employing steady-state acquisition.
